# Supplementary material for: Unexpected lability of the [RuIII(phtpy)Cl3] complex
Source: Royal Society of Chemistry journal article supplement (doi:10.1039/c7dt03658b), 2017-01-01
Supplement: c7dt03658b1.pdf [file c7dt03658b1.pdf]

## SUPPORTING INFORMATION

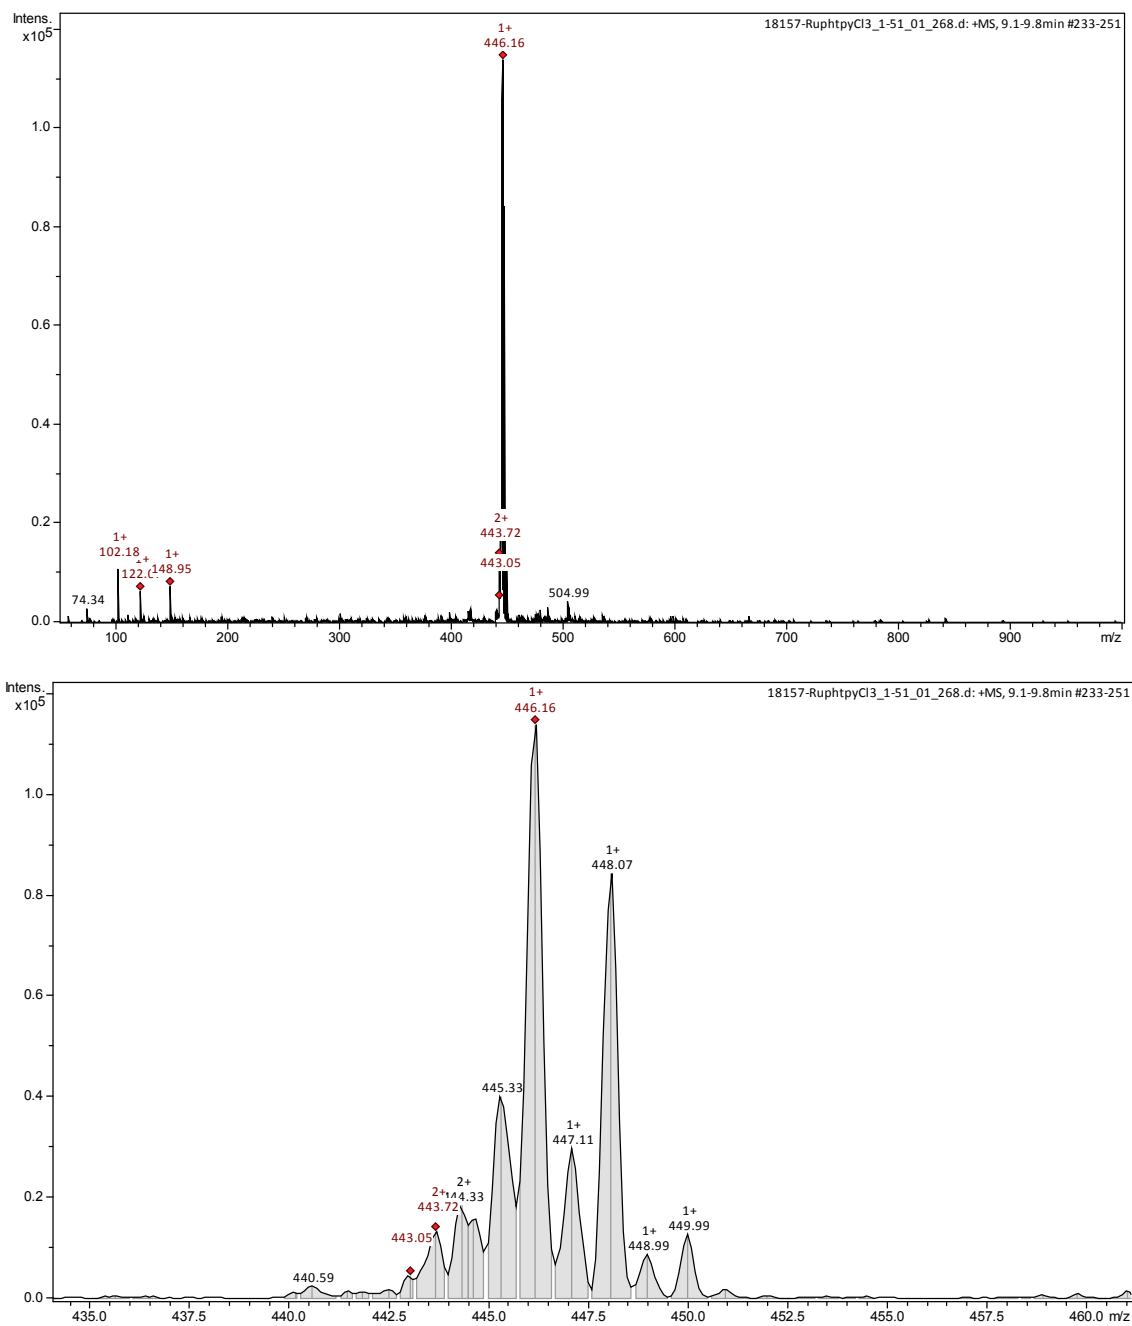

**Figure S1.** ESI-MS spectrum of the [Ru(phtpy)Cl<sub>3</sub>] precursor complex, showing the molecular peak corresponding to the [Ru<sup>II</sup>Cl(phtpy)]<sup>+</sup> species.

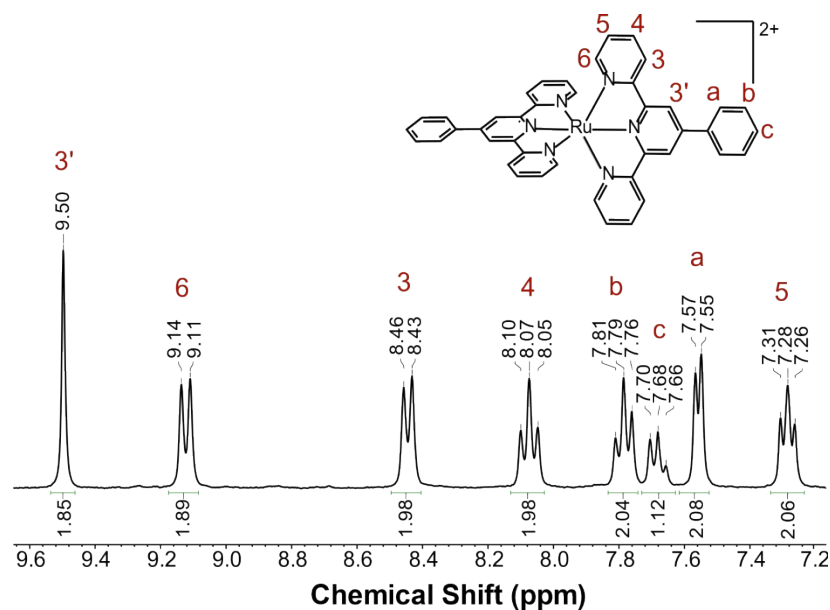

**Figure S2.** <sup>1</sup>H-NMR (DMSO-*d*<sub>6</sub>) spectrum of the main fraction "A" (Figure 1b) of a typical silica gel column chromatography separation process and respective peak assignments. The spectrum is consistent with the [Ru(phtpy)<sub>2</sub>]<sup>2+</sup> complex.

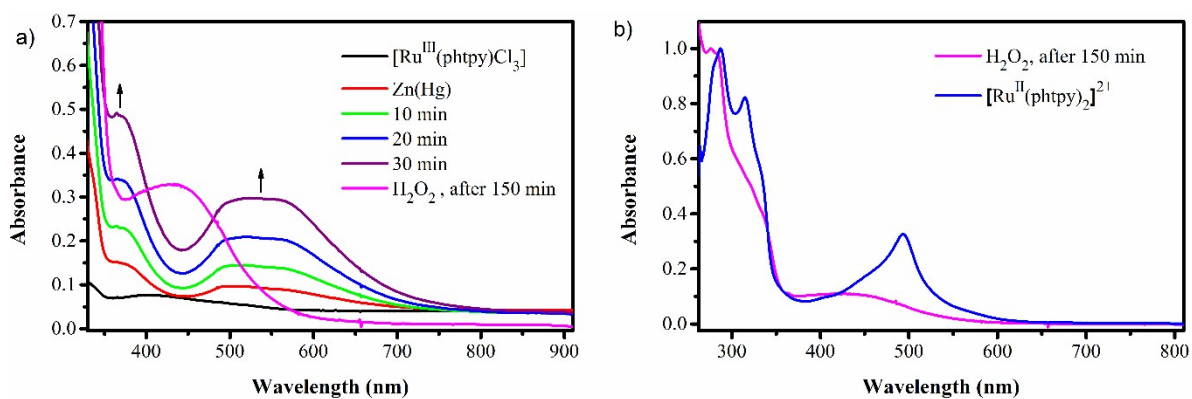

**Figure S3:** a) Evolution of the UV-Vis spectrum as a function of time after addition of zinc amalgam, Zn(Hg), into a solution of [Ru<sup>III</sup>(phtpy)Cl<sub>3</sub>] in MeOH at 50 °C under N<sub>2</sub> atmosphere, generating a spectral profile similar to that shown in Fig. 2a. b) Spectra of [Ru<sup>III</sup>(phtpy)L<sub>1</sub>L<sub>2</sub>L<sub>3</sub>] derivatives (where L<sub>n</sub> = solvent or Cl<sup>-</sup>) generated upon addition of H<sub>2</sub>O<sub>2</sub> solution into the solution in (a) after 150 min (magenta line of Figure S3a) compared with that of [Ru<sup>II</sup>(phtpy)<sub>2</sub>]<sup>2+</sup> (blue line) in MeOH.

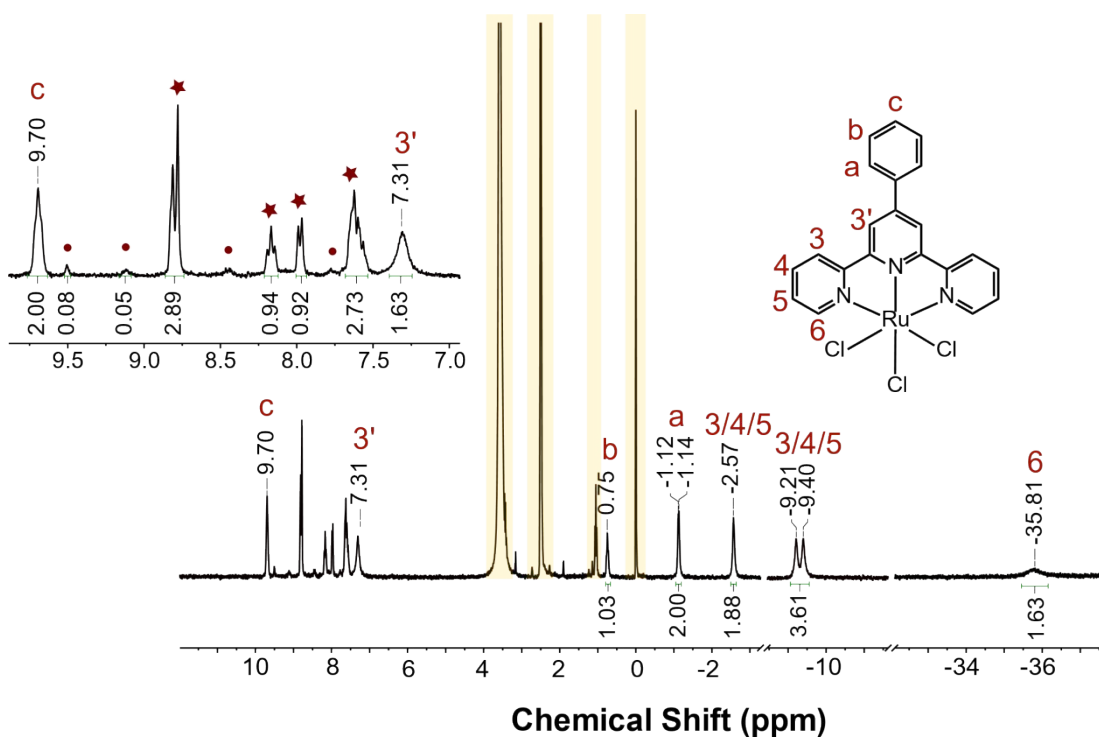

**Figure S4.**  $^1\text{H-NMR}$  spectrum (300 MHz) of the  $[\text{Ru}(\text{phtpy})\text{Cl}_3]$  complex in  $\text{DMSO-}d_6$ , showing signals corresponding to the Ru(III) and Ru(II) species (labeled with stars), and the presence of  $[\text{Ru}^{\text{II}}(\text{phtpy})_2]^{2+}$  complex as impurity (dots). The contrasting spectrum of free phtpy ligand in  $\text{dmsO-}d_6$  is shown in Figure 4.

**Table S1.** Representative experiments carried out for preparation of the binuclear  $[\{\text{Ru}(\text{phtpy})\text{Cl}\}_2(\text{dpimH}_2)]^{2+}$  complex by reaction of  $[\text{Ru}^{\text{III}}(\text{phtpy})\text{Cl}_3]$  precursor and the  $\text{dpimBH}_2$  ligand in a 2:1 stoichiometric ratio.

| Experiment | Solvent                  | Eq. LiCl | T (°C) | Time (hours) | Reducing Agent | Result  |
|------------|--------------------------|----------|--------|--------------|----------------|---------|
| 1          | DMF/H <sub>2</sub> O     | 10       | reflux | 4            | NEM            | mixture |
| 2          | DMF/H <sub>2</sub> O     | 3        | 70     | 0.5          | NEM            | mixture |
| 3          | DMF*                     | 0        | 54     | 2            | NEM            | mixture |
| 4          | EtOH/H <sub>2</sub> O    | 3        | R.T.   | 19           | TEA**          | mixture |
| 5          | EtOH/H <sub>2</sub> O    | 3        | 40     | 6            | TEA            | mixture |
| 6          | EtOH                     | 0        | 37     | 12           | TEA            | mixture |
| 7          | MeOH/H <sub>2</sub> O*** | 1.5      | 80     | 2            | TEA            | mixture |

• Using the aqua complex  $[\text{RuCl}_2(\text{H}_2\text{O})(\text{phtpy})]$

\*\* Triethylamine (TEA)

\*\*\*Slow addition of  $[\text{RuCl}_3(\text{phtpy})]$  to the reaction mixture.

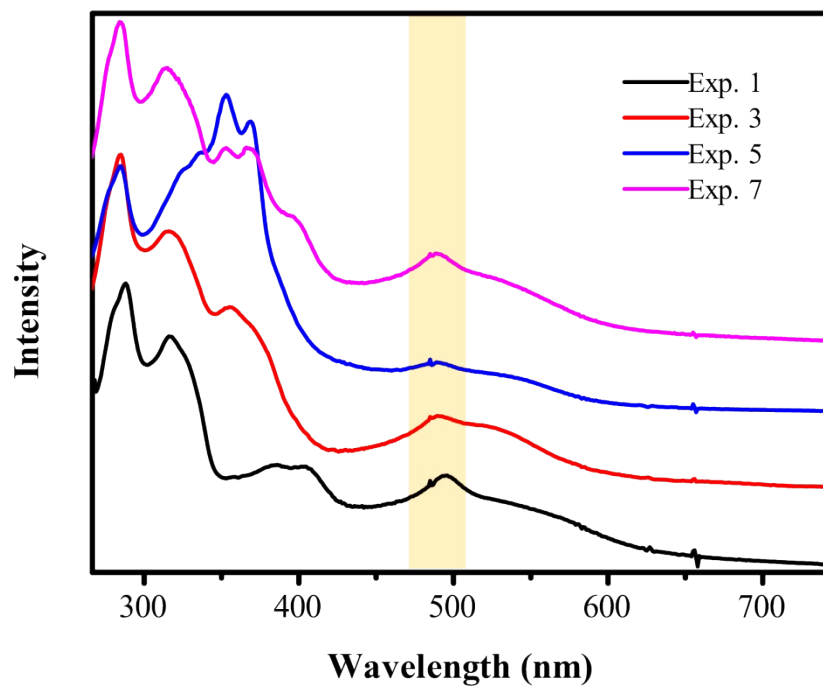

**Figure S5.** UV-vis spectra of some representative experiments among those listed in table S1 relative to the attempts for preparation of  $[\{Ru(phtpy)Cl\}_2(dpimH_2)]^{2+}$  complexes, using a 2:1 stoichiometric ratio of the  $[Ru^{III}(phtpy)Cl_3]$  complex and the  $dpimH_2$  ligand.
